# Supplementary material for: PI3K/AKT signaling modulates transcriptional expression of EWS/FLI1 through specificity protein 1
Source: PubMed Central journal article supplement (PMC4745699; doi:10.18632/oncotarget.5000), 2015-08-22
Supplement: oncotarget-06-28895-s001.pdf [file oncotarget-06-28895-s001.pdf]

## SUPPLEMENTARY FIGURES AND TABLES

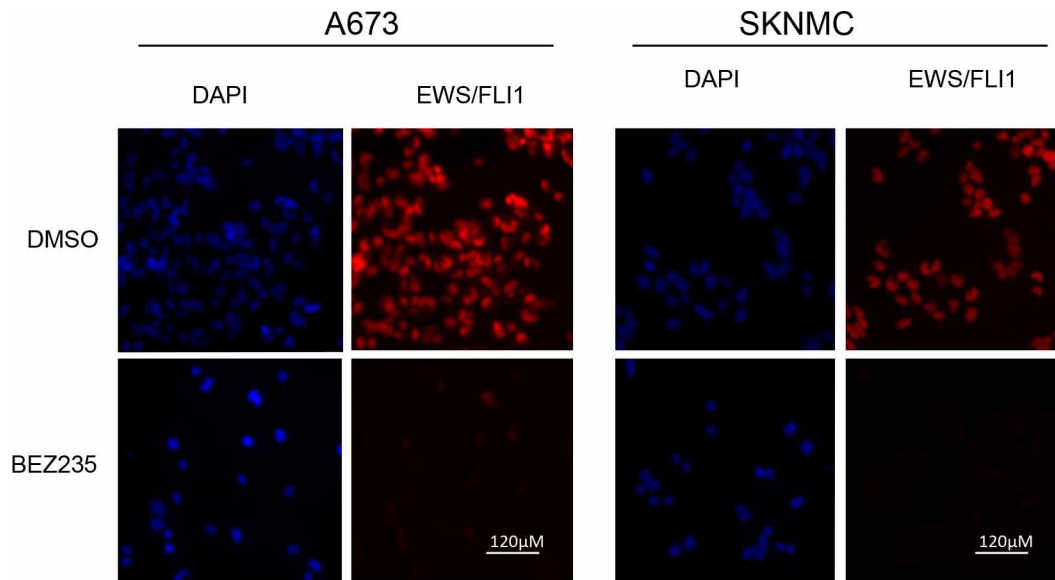

**Supplementary Figure S1: *BEZ235* treatment affects *EWS/FLI1* level.** Representative experiment ( $n = 3$ ) of immunofluorescence assessment of *EWS/FLI1* after *BEZ235* treatment for 24 hrs in A673 and in SKNMC cells.

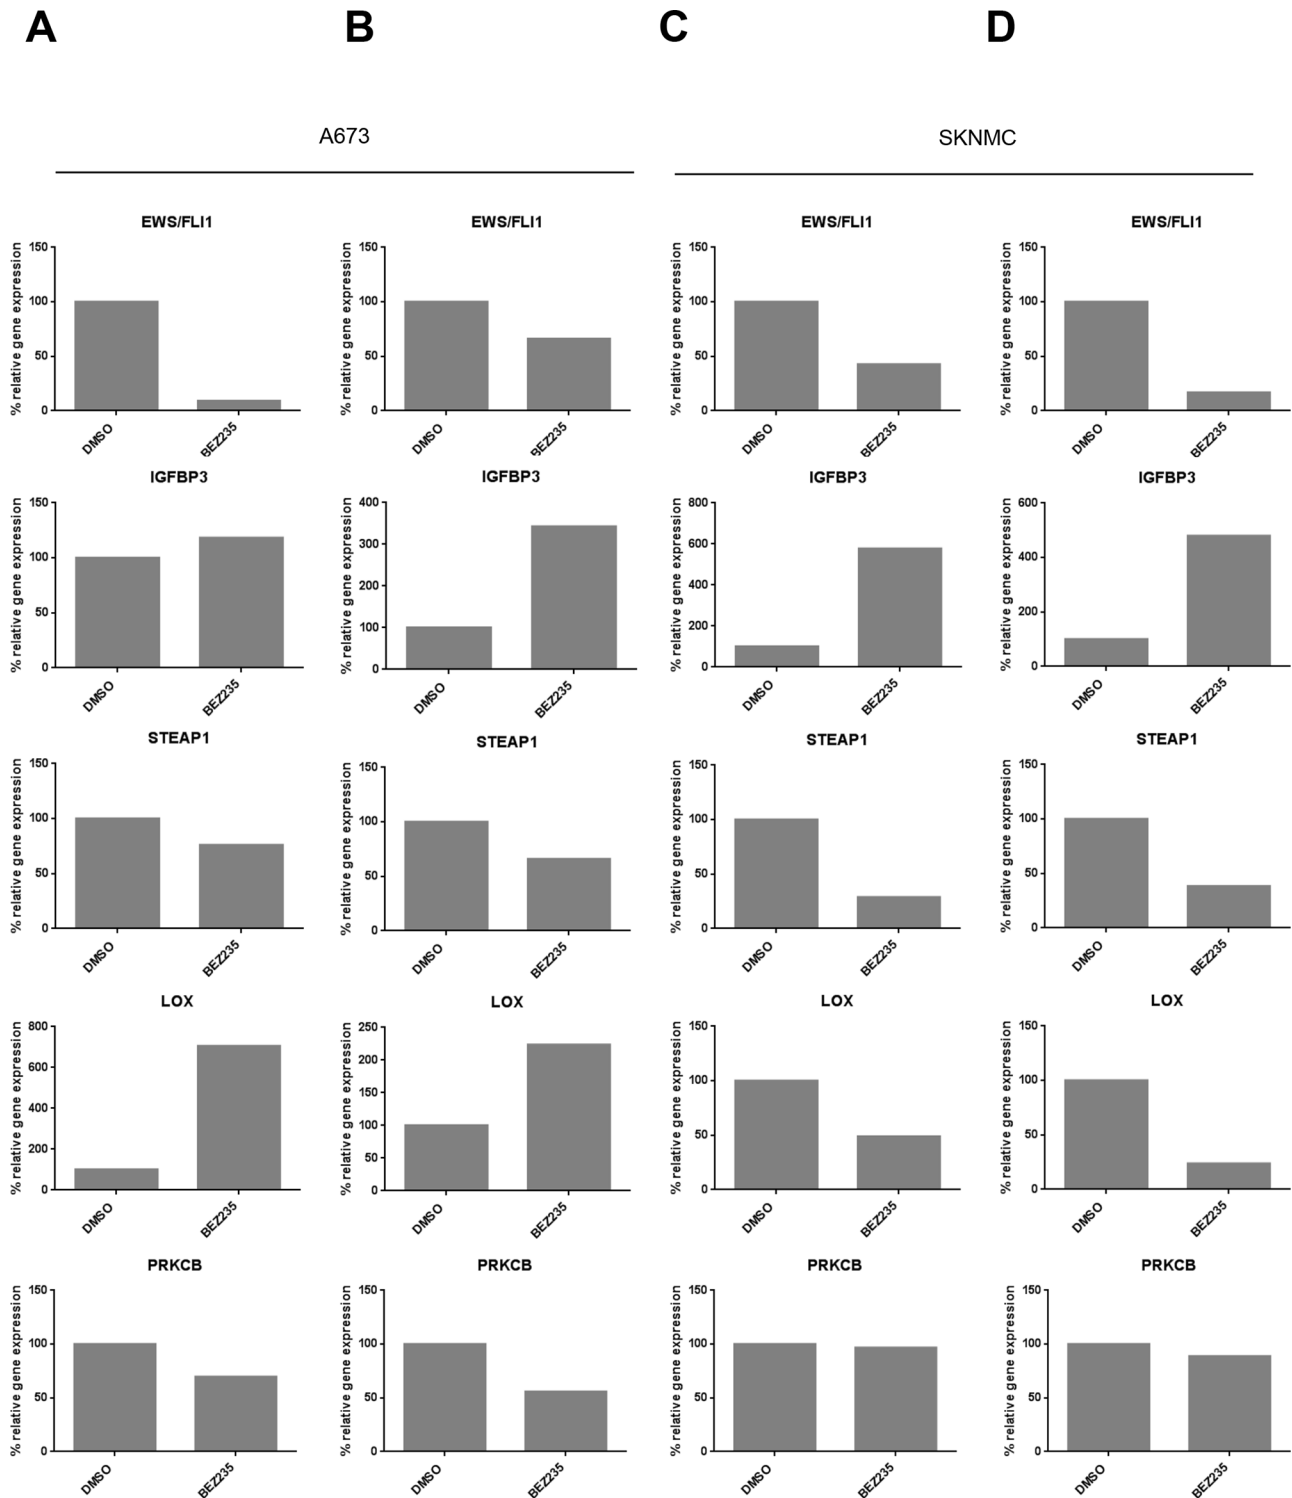

**Supplementary Figure S2: *BEZ235* treatment affects *EWS/FLI1* gene expression and its target genes.** Gene expression level in percentage of *EWS/FLI1* and its repressed (*LOX* and *IGFBP3*) and activated (*PRKCB* and *STEAP1*) target genes after *BEZ235* treatment in A673 **A, B**, and in SKNMC cells **C, D**, for 24 (**A, C**) and 48 hrs (**B, D**). Shown is a representative experiment ( $n = 3$ ).

**A**

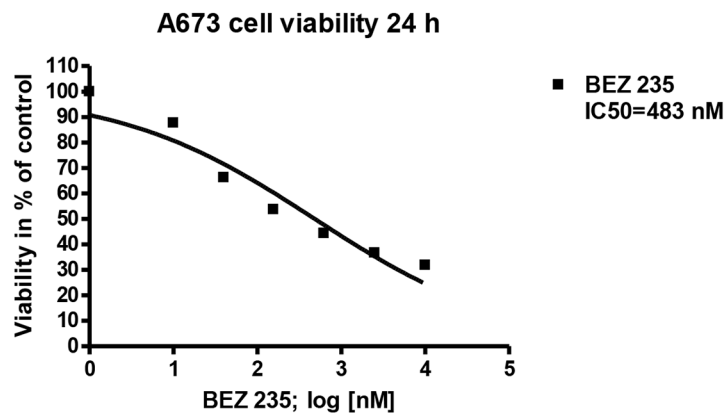

**B**

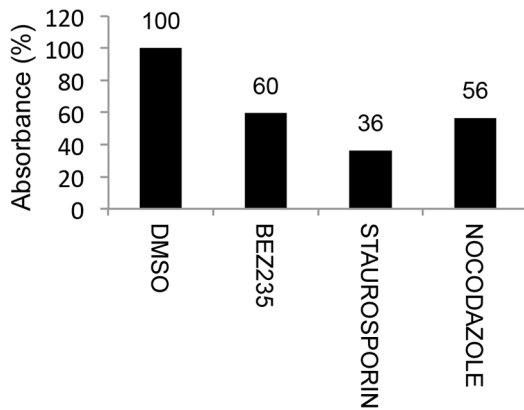

**C**

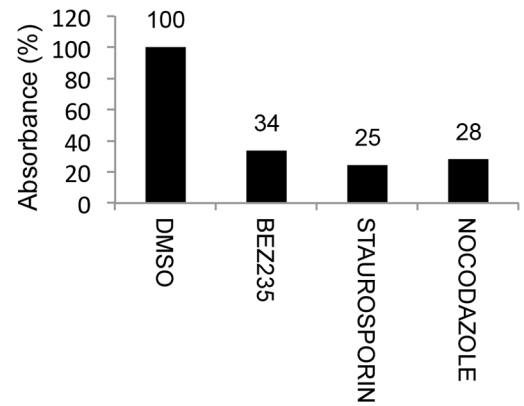

**D**

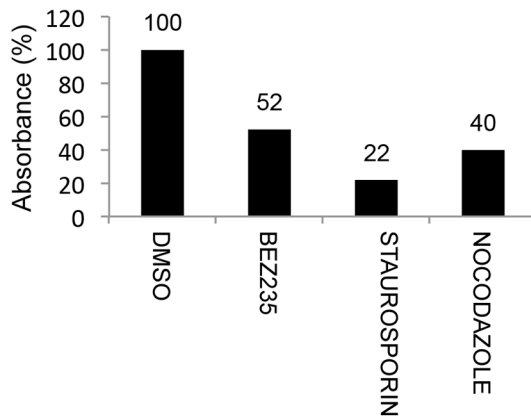

**E**

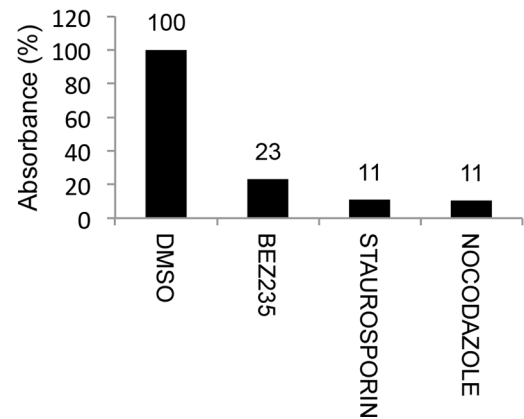

**Supplementary Figure S3:** A. A673 cells viability after 24 hrs treatment with titrating concentration of BEZ235. Absorbance in percentage compared to DMSO treated control after drug treatment for 24 and 48 hrs in A673 **B.** and **C.** and SKNMC cells **D.** and **E.** Bars represent mean values of 8 biological replicates analysed in three technical replicates each ( $n = 3$ ; SE < 0.01).

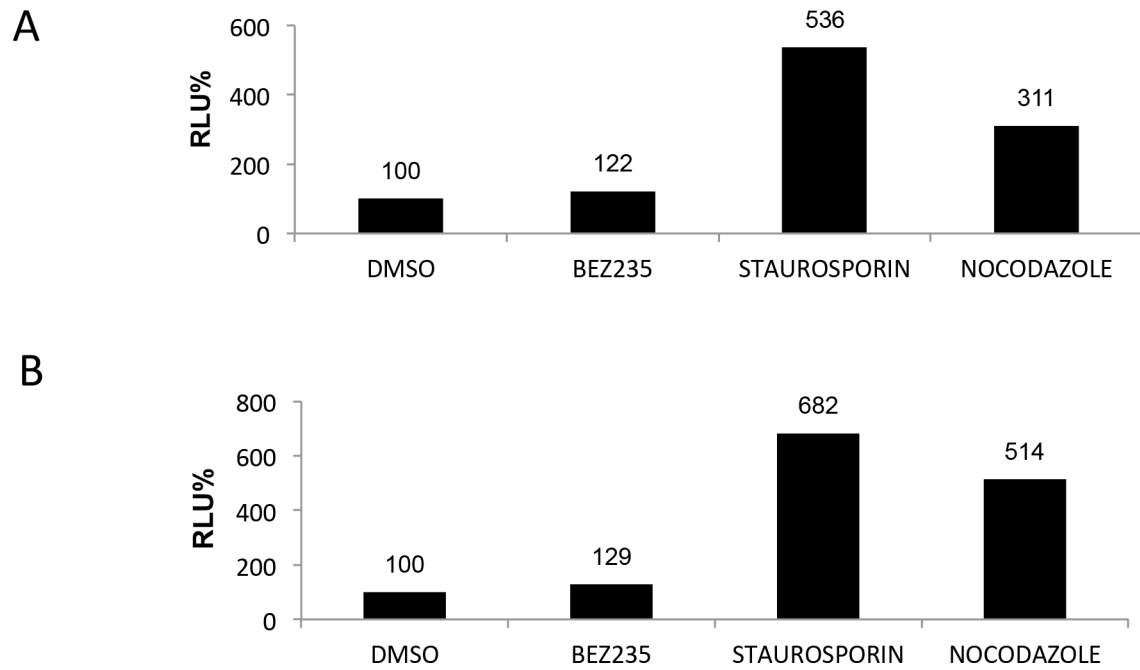

**Supplementary Figure S4: CASPASE 3/7 ACTIVITY.** Caspase 3/7 activity measured after 24 hrs treatment with 500 nM BEZ235, 1  $\mu$ M Staurosporin and 100 nM Nocodazole in A673 **A.** and SKNMC cells **B.** Bars represent mean values expressed as relative light unit (RLU) in percentage of DMSO treated control of 6 biological replicate analysed in three technical replicates each ( $n = 3$ ; SE < 0.01).

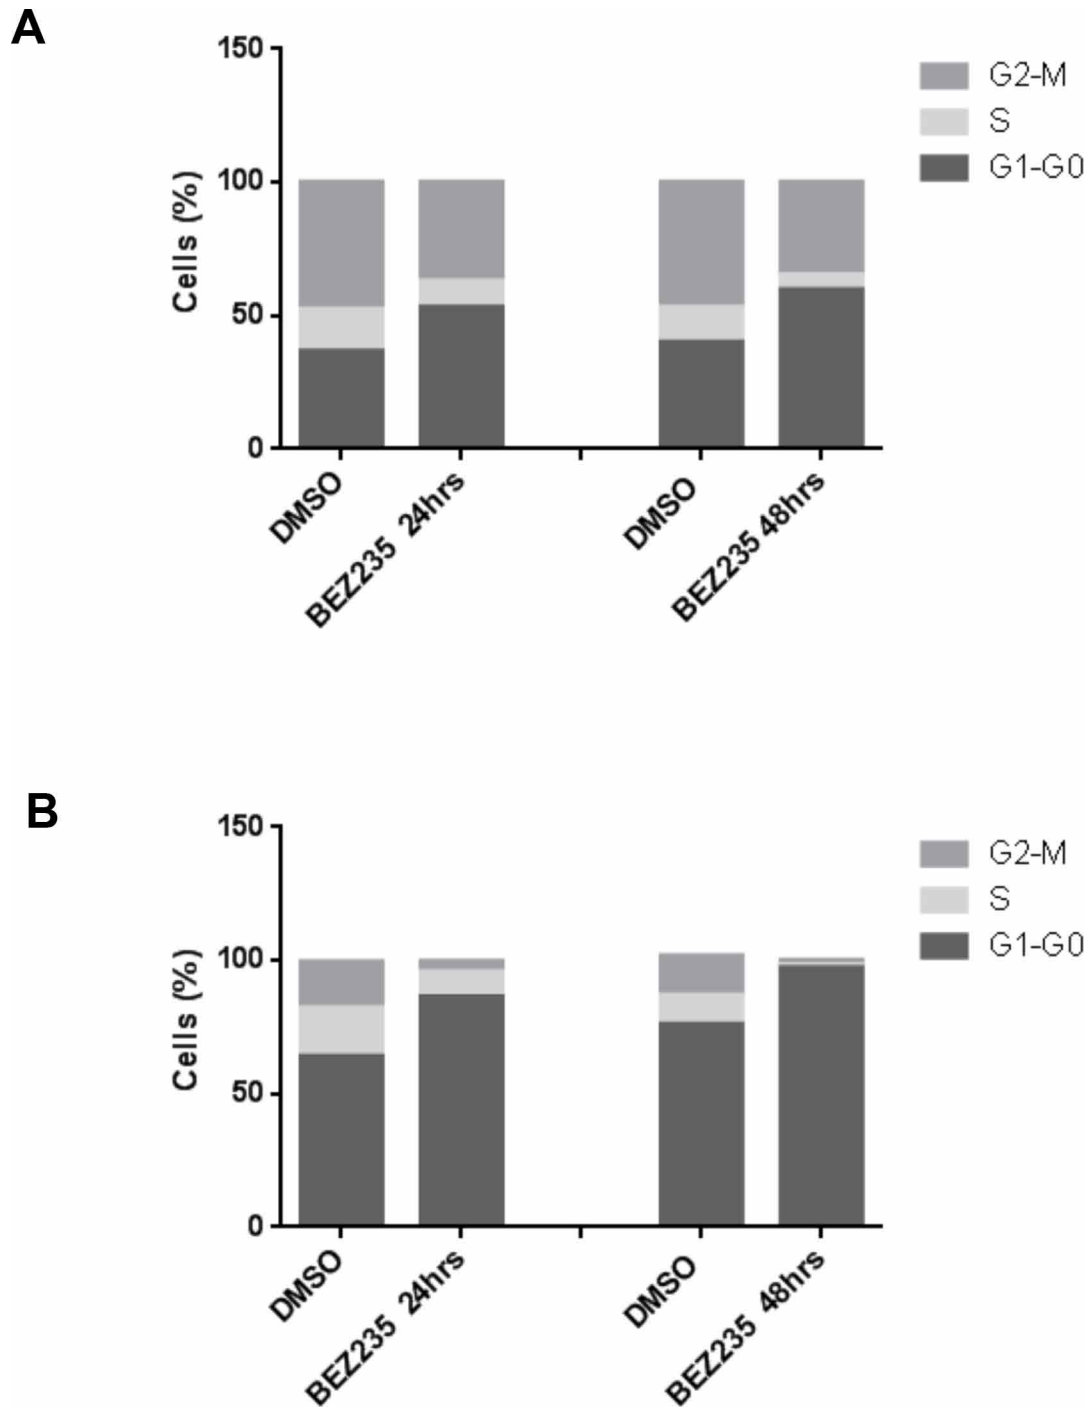

**Supplementary Figure S5: Cell cycle progression upon BEZ235 treatment.** Cell cycle analysis after 24 and 48 hrs treatment with 500 nM BEZ235 compared to DMSO treated control in A673 **A.** and SKNMC **B.** Shown is a representative experiment ( $n = 3$ ).

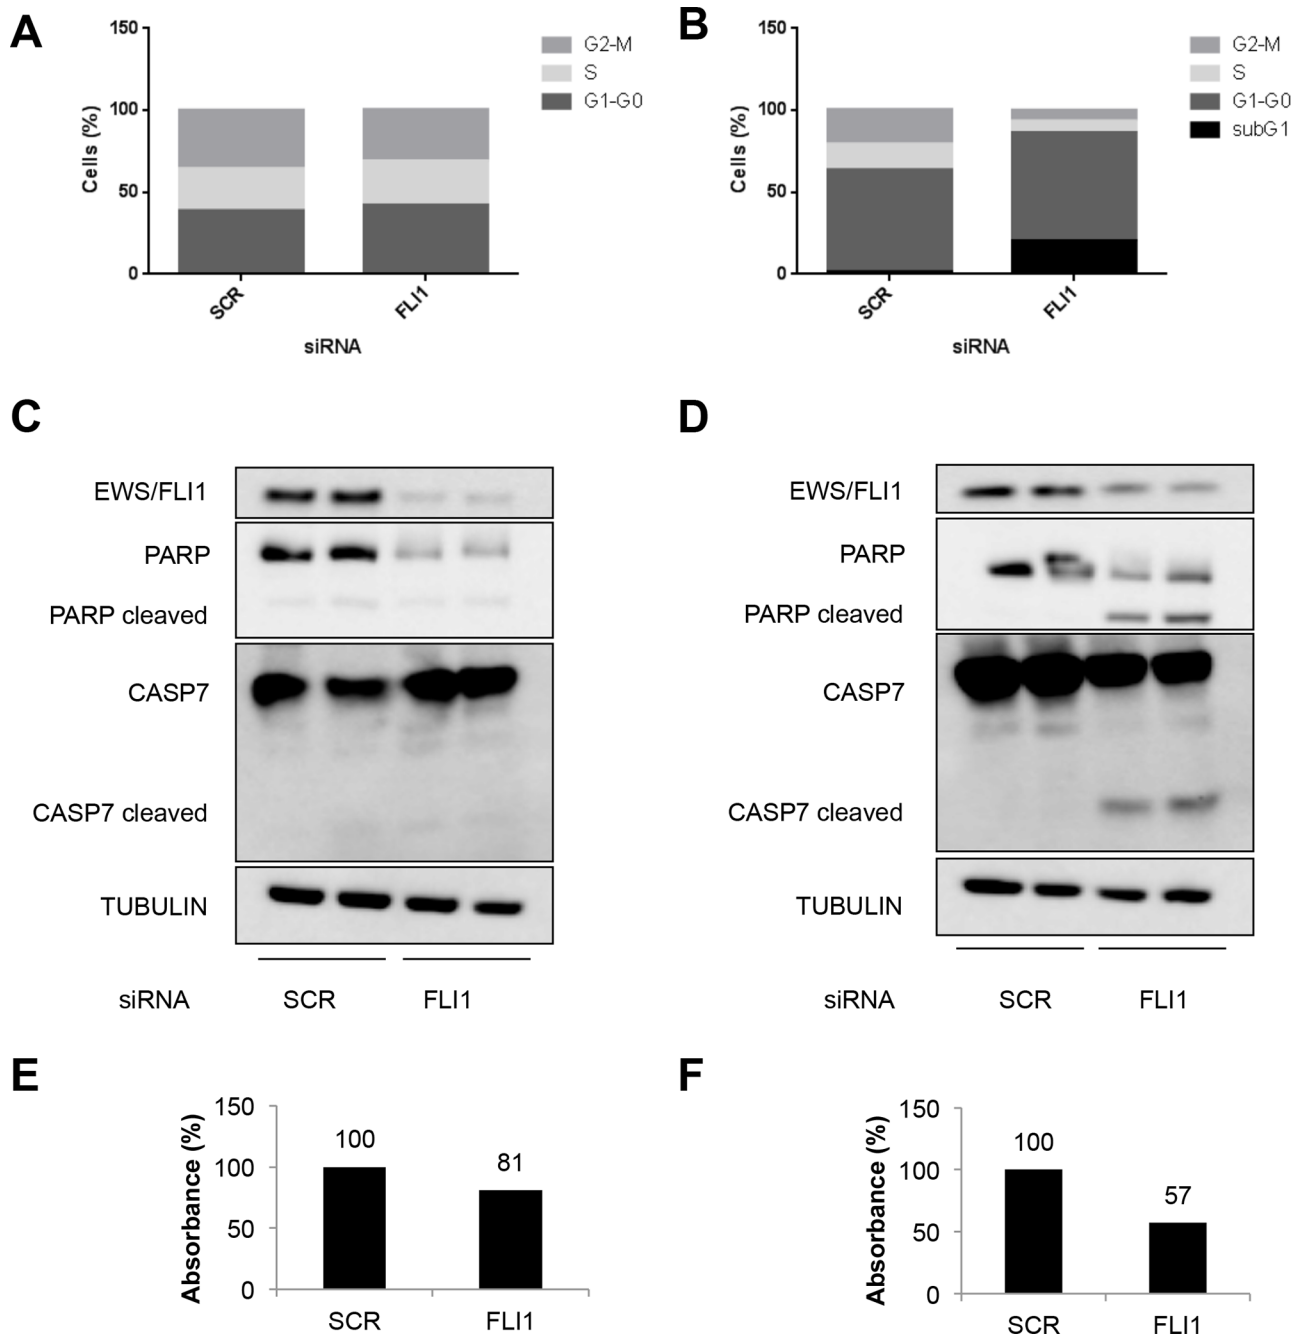

**Supplementary Figure S6: Cell cycle progression after silencing of EWS/FLI1.** Cell cycle analysis upon EWS/FLI1 depletion for 48 hrs in A673 **A.** and SKNMC cells **B.** Protein level measured by western blot of EWS/FLI1, PARP, CASP7 and TUBULIN in A673 **C.** and SKNMC cells **D.** after silencing of EWS/FLI1 in biological duplicates. **E.** Absorbance in percentage of viable cells upon depletion of EWS/FLI1 in A673 and SKNMC cells **F.** compared to Scr control. Shown are representative experiments ( $n = 3$ ).

**A**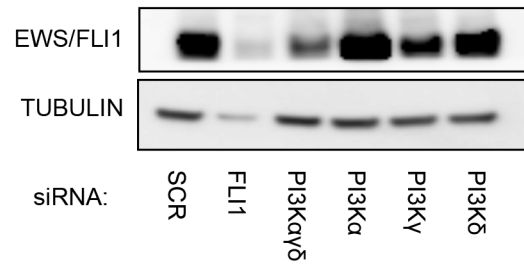**B**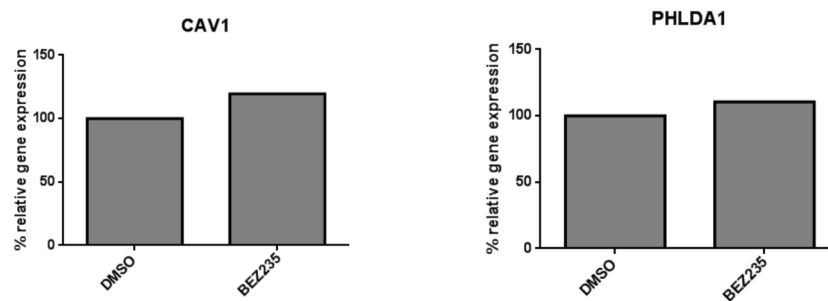

**Supplementary Figure S7: Effects of PI3K pathway inhibition on EWS/FLI1 and its target genes.** **A.** siRNA mediated knockdown of PI3K components for 48 hrs in order to determine EWS/FLI1 level in SKNMC cells. **B.** mRNA level of EWS/FLI1 target genes expressed endogenously in PC3 cells after BEZ235 treatment for 24 hrs. Shown are representative experiments ( $n = 3$ ).

**A**

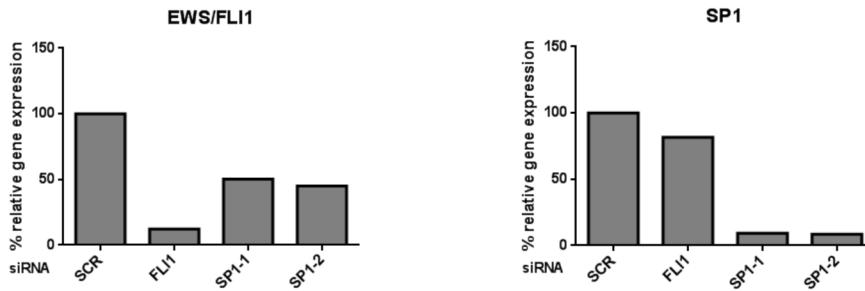

**B**

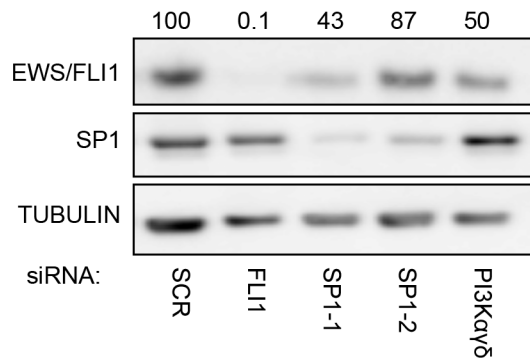

**C**

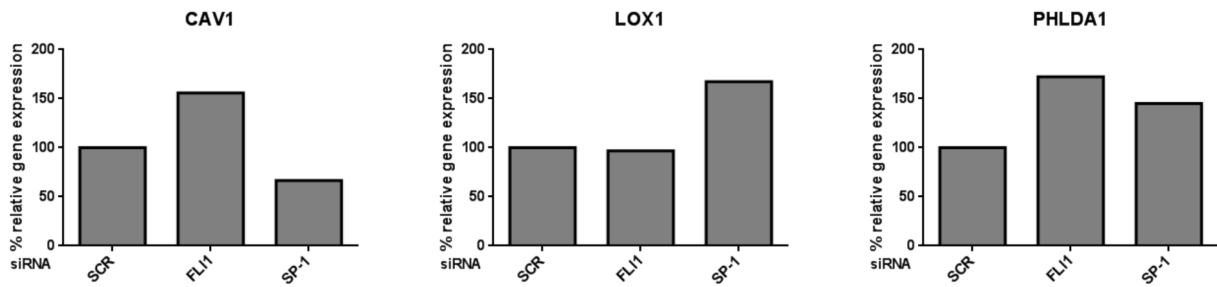

**Supplementary Figure S8: Effects of SP1 silencing on EWS/FLI1 level and *ist* target genes.** **A.** siRNA mediated knockdown of SP1 for 48 hrs in order to determine mRNA expression of EWS/FLI1, and SP1 (via qRT-PCR) in SKNMC cells. **B.** Protein level assessment of EWS/FLI1 via western blot after silencing of SP1 or PI3Kαγδ in SKNMC cells. **C.** mRNA level of EWS/FLI1 target genes expressed endogenously in PC3 cells after silencing of SP1 for 48 hrs. Shown are representative experiments ( $n = 3$ ).



**A**

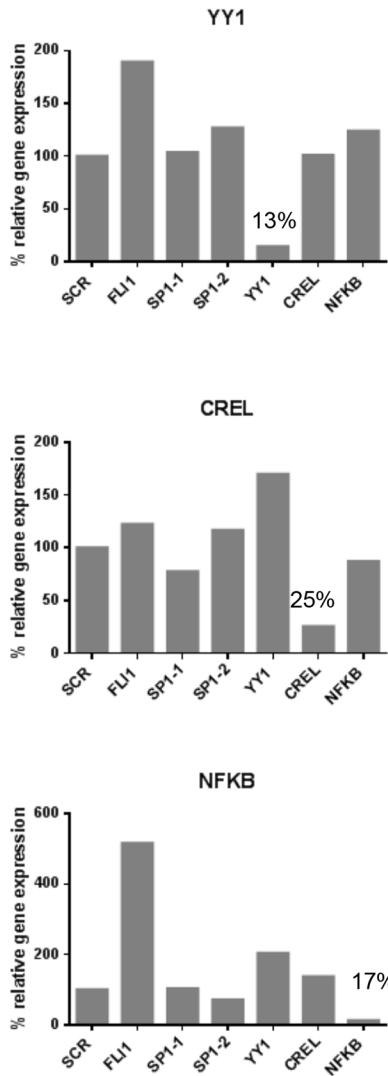

**B**

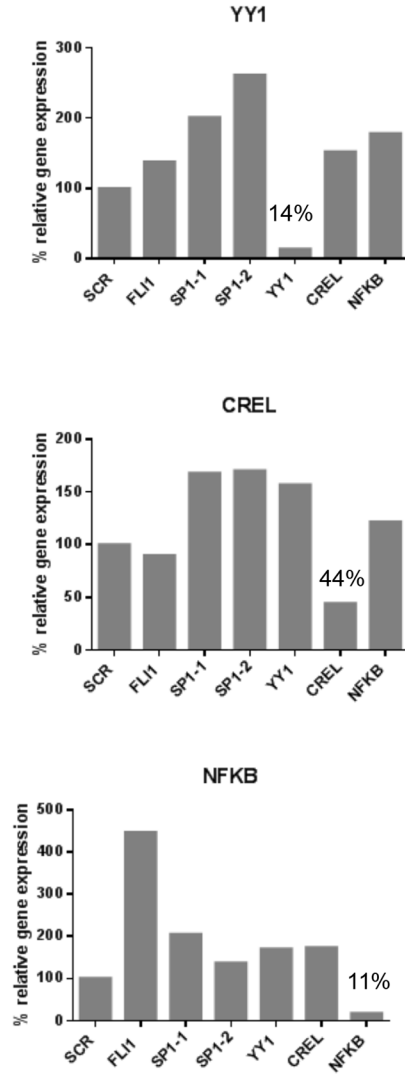

**C**

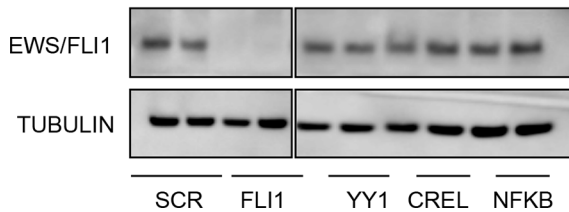

**D**

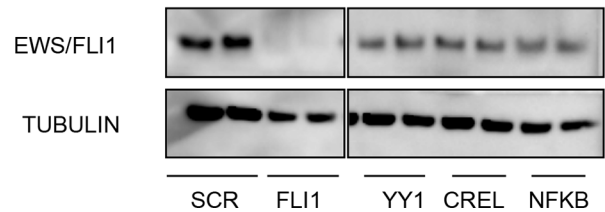

**Supplementary Figure S9: Validation of the knock down of transcription factors candidates for the Del23 region and its effect on EWS/FLI1.** Gene expression data after reverse knock down candidates for Del23 region in SKNMC **A.** and A673 **B.** EWS/FLI1 protein level after silencing for 48 hrs of the candidate transcription factors by siRNA in SKNMC cells **C.** and A673 **D.** Shown are representative experiments ( $n = 3$ ).

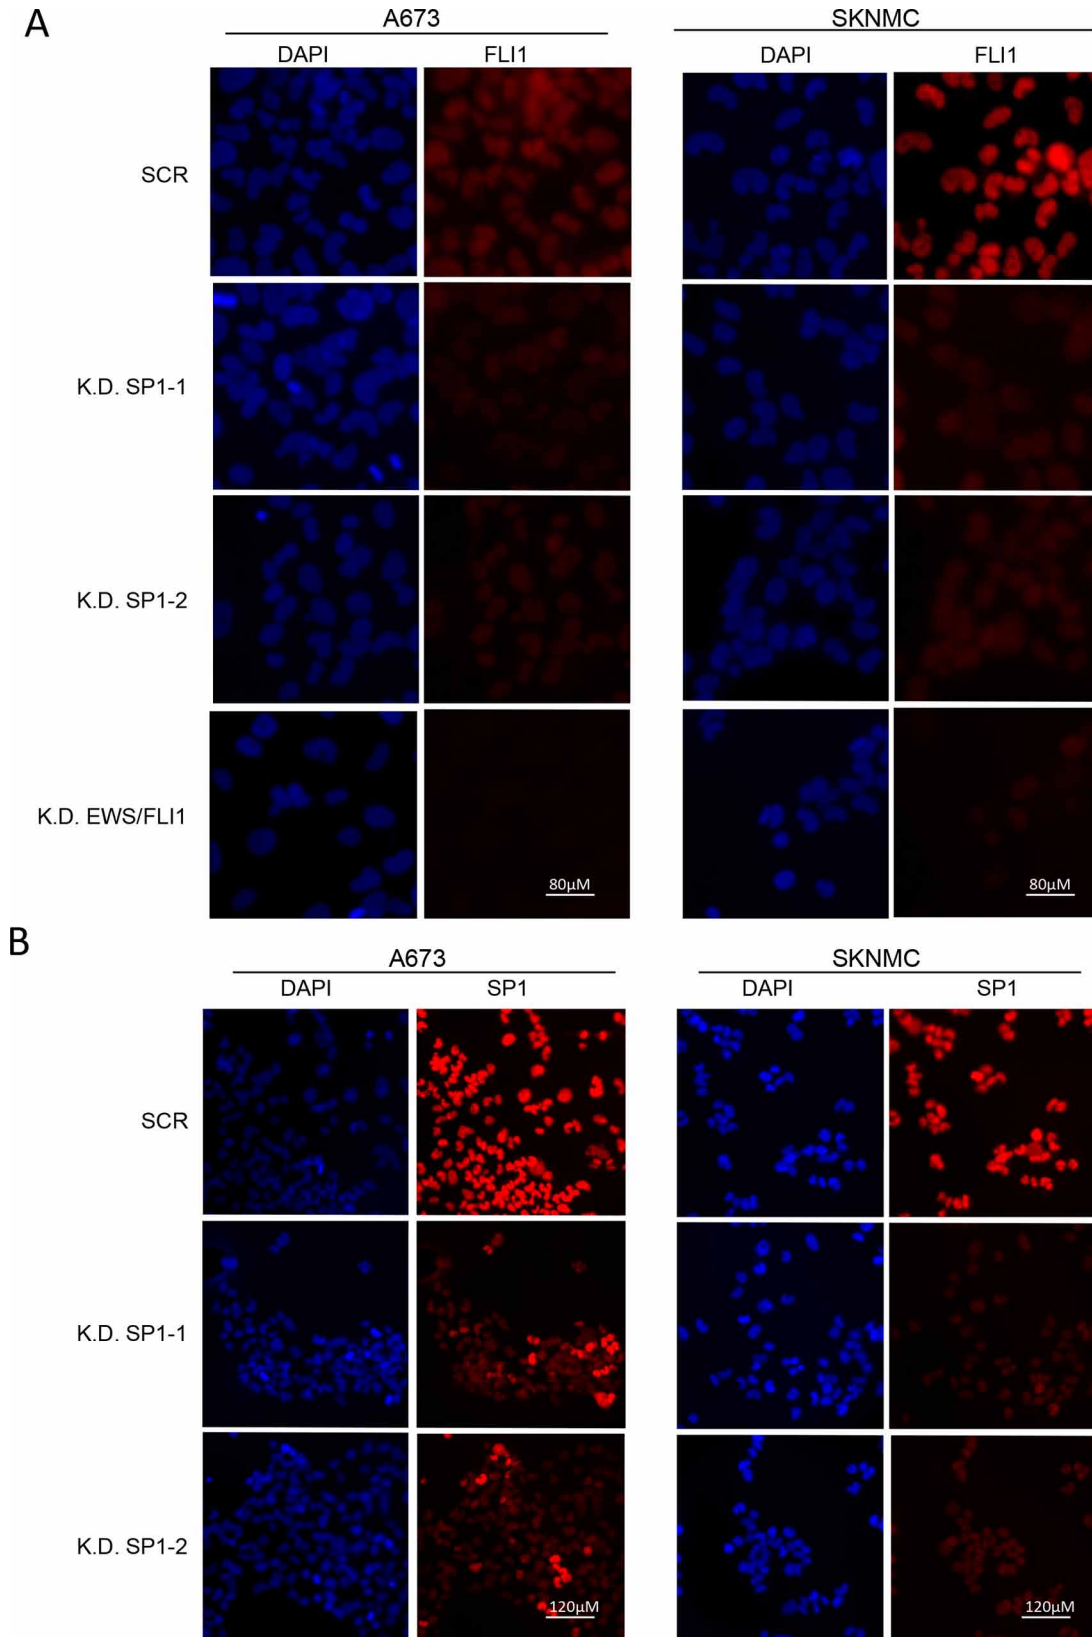

**Supplementary Figure S10: *SP1* knock down affects *EWS/FLI1* level.** Immunofluorescence assessment of *EWS/FLI1* **A.** and *SP1* **B.** after reverse knock down of *SP1* in A673 and SKNMC cells. Exposure times were kept constant for all samples.

**Supplementary Table S1: List of targeted inhibitors used in the screening**

| No. | Name                                   | Target                           |
|-----|----------------------------------------|----------------------------------|
| 1   | [Ala92]-p16 (84–103)                   | Cdk inhibitor                    |
| 2   | 17-AAG                                 | Hsp90 inhibitor                  |
| 3   | 2-Deoxy-D-glucose                      | Glycolysis inhibitor             |
| 4   | 3-MA                                   | Vps34 inhibitor (class III PI3K) |
| 5   | A 769662                               | AMPK activator                   |
| 6   | ABT-102                                | TRVP1 antagonist                 |
| 7   | ABT-737                                | BCL-2, BCL-xl inhibitor          |
| 8   | AEG 3482                               | JNK inhibitor                    |
| 9   | AG 013736 - Axitinib                   | VEGFR inhibitor                  |
| 10  | AMD3100                                | CXCR4 inhibitor                  |
| 11  | AMN 107 (Nilotinib)                    | BCR-ABL inhibitor                |
| 12  | Apratastat                             | TACE/MMP inhibitor               |
| 13  | AS 252424                              | PI3K p110 gamma inhibitor        |
| 14  | AT9283                                 | Aurora kinases Inhibitor         |
| 15  | Atazanivir                             | Protease inhibitor               |
| 16  | AZD 2281 - Olaparib                    | PARP inhibitor                   |
| 17  | AZD 7762                               | CHK inhibitor                    |
| 18  | AZD1152-HQPA                           | Aurora B inhibitor               |
| 19  | BACE 1 inhibitor                       | Beta Secretase inhibitor         |
| 20  | Bax inhibitor peptide P5               | Bcl-2 Protein Family Inhibitor   |
| 21  | Bax inhibitor peptide V5               | Bcl-2 Protein Family Inhibitor   |
| 22  | Bax inhibitor peptide,negative control | Bcl-2 Protein Family Inhibitor   |
| 23  | BAY 61–3606                            | Syk inhibitor                    |
| 24  | BI 2536                                | PLK-1 inhibitor                  |
| 25  | BMS 189961                             | RAR gamma agonist                |
| 26  | BMS 270394                             | RAR gamma agonist                |
| 27  | BMS-345541                             | IκB inhibitor                    |
| 28  | Bosutinib (SKI 606)                    | BCR-ABL/SRC inhibitor            |
| 29  | Butabindide                            | TPPII inhibitor                  |
| 30  | BX 795                                 | PDK1/TBK1 inhibitor              |
| 31  | BX 912                                 | PDK1 inhibitor                   |
| 32  | BZ - Gamma Secretase inhibitor BZ      | Gamma Secretase inhibitor        |
| 33  | Cediranib                              | VEGFR inhibitor                  |
| 34  | CH 55                                  | RAR alpha/beta agonist           |

(Continued)

| No. | Name                     | Target                              |
|-----|--------------------------|-------------------------------------|
| 35  | Chir98014                | GSK-3 inhibitor                     |
| 36  | CI-1033 - Canertinib     | EGFR inhibitor                      |
| 37  | Combretastatin-A4 (CA-4) | Inhibitor of tubulin polymerization |
| 38  | Compound C               | AMPK inhibitor                      |
| 39  | CP 690550                | JAK3 inhibitor                      |
| 40  | CT 99021 - CHIR 99021    | GSK-3 inhibitor                     |
| 41  | Cyclopamine              | Hedgehog Pathway Inhibitor          |
| 42  | Cyclosporine             | Immunosuppressant                   |
| 43  | DAPT                     | Gamma Secretase inhibitor           |
| 44  | Dasatinib                | BCR-ABL/SRC inhibitor               |
| 45  | DBZ                      | Gamma Secretase inhibitor           |
| 46  | Deguelin                 | Anticancer agent                    |
| 47  | DM 3189                  | BMP inhibitor                       |
| 48  | Doramapimod              | p38 MAPK inhibitor                  |
| 49  | DR 2313                  | PARP inhibitor                      |
| 50  | FK 866                   | NAPRT1 inhibitor, anti-cancer agent |
| 51  | GDC 0879                 | B-Raf inhibitor                     |
| 52  | GDC 0941                 | PI3K inhibitor                      |
| 53  | GDC-0449                 | Hedgehog Pathway Inhibitor          |
| 54  | Gefitinib                | EGFR inhibitor                      |
| 55  | GSK 269962A              | ROCK1 inhibitor                     |
| 56  | GW 441756                | TrkA inhibitor                      |
| 57  | GW 786034                | VEGFR/KIT/PDGFR inhibitor           |
| 58  | GW 843682X               | PLK inhibitor                       |
| 59  | Honokiol                 | pAkt, scr, p44/42 MAPK              |
| 60  | HU-308                   | CB2 agonist                         |
| 61  | IGC-001                  | Beta-Catenin inhibitor              |
| 62  | Imatinib                 | BCR-ABL inhibitor                   |
| 63  | JAK inhibitor I          | JAKs inhibitor                      |
| 64  | JIP-1 (153–163)          | JNK Inhibitor                       |
| 65  | JWH 018                  | CB2 agonist                         |
| 66  | JWH 073                  | CB1/2 agonist                       |
| 67  | JWH 133                  | CB2 agonist                         |
| 68  | Ko 143                   | BCRP inhibitor                      |
| 69  | KU-55933                 | ATM inhibitor                       |
| 70  | L-685,485                | Gamma Secretase inhibitor           |

(Continued)

| No. | Name                  | Target                       |
|-----|-----------------------|------------------------------|
| 71  | L-aminoadipic acid    | Glutamine synthase inhibitor |
| 72  | Lamotrigine           | Glutamate antagonist         |
| 73  | Lapatinib             | EGFR/ErbB-2 inhibitor        |
| 74  | LE-135                | RAR beta antagonist          |
| 75  | LY 2157299            | TGF beta receptor inhibitor  |
| 76  | LY 294002             | PI3K inhibitor               |
| 77  | Masitinib mesylate    | KIT/PDGFR inhibitor          |
| 78  | MK 1775               | Wee1 inhibitor               |
| 79  | MK-2206               | Akt inhibitor                |
| 80  | MLN8237               | Aurora kinase inhibitor      |
| 81  | Myoseverin            | Microtubule inhibitor        |
| 82  | Na-Butyrate           | HDAC inhibitor               |
| 83  | NEC-1                 | Necroptosis/RIPK inhibitor   |
| 84  | NF-kB Inhibitor       | NF-kB Inhibitor              |
| 85  | Nocodazole            | Cell cycle G2/M inhibitor    |
| 86  | NSC 348884            | Nucleophosmin inhibitor      |
| 87  | NSC 625987            | CDK4 inhibitor               |
| 88  | NU 1025               | PARP inhibitor               |
| 89  | NU 7441               | DNA-PK inhibitor             |
| 90  | NVP-AEW514            | IGF-1R inhibitor             |
| 91  | NVP-AUY922            | HSP90 inhibitor              |
| 92  | NVP-BAG956            | PI3K/PDK1 inhibitor          |
| 93  | NVP-BEZ235            | PI3K/mTOC inhibitor          |
| 94  | NVP-BGJ398            | FGF-R inhibitor              |
| 95  | NVP-BKM120            | PI3K, not mTOC inhibitor     |
| 96  | NVP-BSK805            | JAK2 inhibitor               |
| 97  | NVP-TAE684            | ALK inhibitor                |
| 98  | NVP-TKI258            | FGF-R inhibitor              |
| 99  | Obatoclax             | Bcl-2 inhibitor              |
| 100 | OSI 774 - Erlotinib   | EGFR inhibitor               |
| 101 | OSI-027               | mTORC1/2 inhibitor           |
| 102 | Palmitoylethanolamide | Endocannabinoid              |
| 103 | PD 0325901            | MEK inhibitor                |
| 104 | PD 166793             | MMP inhibitor                |
| 105 | PD 169316             | p38 MAPK inhibitor           |
| 106 | PD 180970             | Src kinase inhibitor         |
| 107 | PD 184352             | MEK 1 inhibitor              |

(Continued)

| No. | Name                     | Target                                    |
|-----|--------------------------|-------------------------------------------|
| 108 | PD 98059                 | MEK inhibitor                             |
| 109 | PD150606                 | Calpain inhibitor                         |
| 110 | PF-00356231              | MMP-12 inhibitor                          |
| 111 | PHA-739358(Danusertib)   | Aurora kinases,Bcr-Abl and FGFR inhibitor |
| 112 | PI 103                   | Class I PI3K inhibitor                    |
| 113 | piceatannol              | Syk inhibitor                             |
| 114 | PIK 75                   | PI3K p110 alpha inhibitor                 |
| 115 | PIK 90                   | PI3K p110 alpha inhibitor                 |
| 116 | pimecrolimus             | Calcineurin inhibitor                     |
| 117 | PLX 4720                 | B-Raf inhibitor                           |
| 118 | PP2                      | Src inhibitor                             |
| 119 | PP242                    | mTORC1/2 inhibitor                        |
| 120 | PU-H71                   | HSP90 inhibitor                           |
| 121 | Roscovitin/Celiclib      | Cdk inhibitor                             |
| 122 | Ruboxistaurin (LY333531) | PKC beta inhibitor                        |
| 123 | S31-201                  | Stat3 Inhibitor                           |
| 124 | Saracatinib              | Src and Abl inhibitor                     |
| 125 | SB 202190                | p38 MAPK inhibitor                        |
| 126 | SB 203580                | p38 MAPK inhibitor                        |
| 127 | SB 216763                | GSK-3 inhibitor                           |
| 128 | SB 431542                | TGF beta receptor inhibitor               |
| 129 | Scriptaid                | HDAC inhibitor                            |
| 130 | SD 169                   | p38 MAPK inhibitor                        |
| 131 | SD 208                   | TGF-betaR receptor 1 inhibitor            |
| 132 | SL 327                   | MEK1/2 inhibitor                          |
| 133 | SNS-314                  | Aurora kinase inhibitor                   |
| 134 | Sorafenib (BAY 43-9006)  | Raf/Mek/Erk inhibitor                     |
| 135 | Stobadine                | Antioxidant                               |
| 136 | SU 6656                  | Src kinase inhibitor                      |
| 137 | SU11274                  | c-Met inhibitor                           |
| 138 | Sunitinib - SU 11248     | Multiple RTK inhibitor                    |
| 139 | Tacrolimus               | Calcineurin inhibitor                     |
| 140 | Tandutinib               | FLT3 inhibitor                            |
| 141 | TG101348                 | JAK2 (Flt3) inhibitor                     |
| 142 | TGX 221                  | PI3K p110 beta inhibitor                  |
| 143 | Tiplaxtinin              | PAI-1 inhibitor                           |
| 144 | TW-37                    | Bcl-2 protein family inhibitor            |

(Continued)

| No. | Name              | Target                                       |
|-----|-------------------|----------------------------------------------|
| 145 | Tyrphostin AG 490 | JAK2 inhibitor                               |
| 146 | U 73122           | Phospholipase C inhibitor                    |
| 147 | Vandetanib        | VEGFR/EGFR Inhibitor                         |
| 148 | Velcade           | Proteasome inhibitor                         |
| 149 | Vorinostat/SAHA   | HDAC inhibitor                               |
| 150 | VPA               | HDAC inhibitor                               |
| 151 | xav-939           | Wnt/beta-catenin signal transd. inhibitor    |
| 152 | XL228             | Multiple Tyr-kinase inhib. (IGF1-R, Bcr-Abl) |
| 153 | Y-27632           | p160 ROCK inhibitor                          |

**Supplementary Table S2: Deletion constructs of the 2.3kb EWS/FLI1 promoter construct**

| Name of the construct | Position of the deletion relative to the transcription initiation site |
|-----------------------|------------------------------------------------------------------------|
| Del1                  | -214/-203                                                              |
| Del2                  | -202/-191                                                              |
| Del3                  | -190/-179                                                              |
| Del4                  | -178/-167                                                              |
| Del5                  | -166/-155                                                              |
| Del6                  | -154/-143                                                              |
| Del7                  | -142/-131                                                              |
| Del8                  | -130/-119                                                              |
| Del9                  | -118/-107                                                              |
| Del10                 | -106/-95                                                               |
| Del11                 | -94/-83                                                                |
| Del12                 | -82/-71                                                                |
| Del13                 | -70/-59                                                                |
| Del14                 | -58/-47                                                                |
| Del15                 | -46/-35                                                                |
| Del16                 | -34/-23                                                                |
| Del17                 | -22/-11                                                                |
| Del18                 | -10/+2                                                                 |
| Del19                 | +3/+14                                                                 |
| Del20                 | +15/+26                                                                |
| Del21                 | +27/+40                                                                |
| Del22                 | +41/+54                                                                |
| Del23                 | +55/+68                                                                |
| Del24                 | +69/+80                                                                |
